# Supplementary figures and images for: Modelling multiple time-scales with flexible parametric survival models
Source: Research Square preprint supplement (doi:10.21203/rs.3.rs-1268869/v1), 2022-01-31

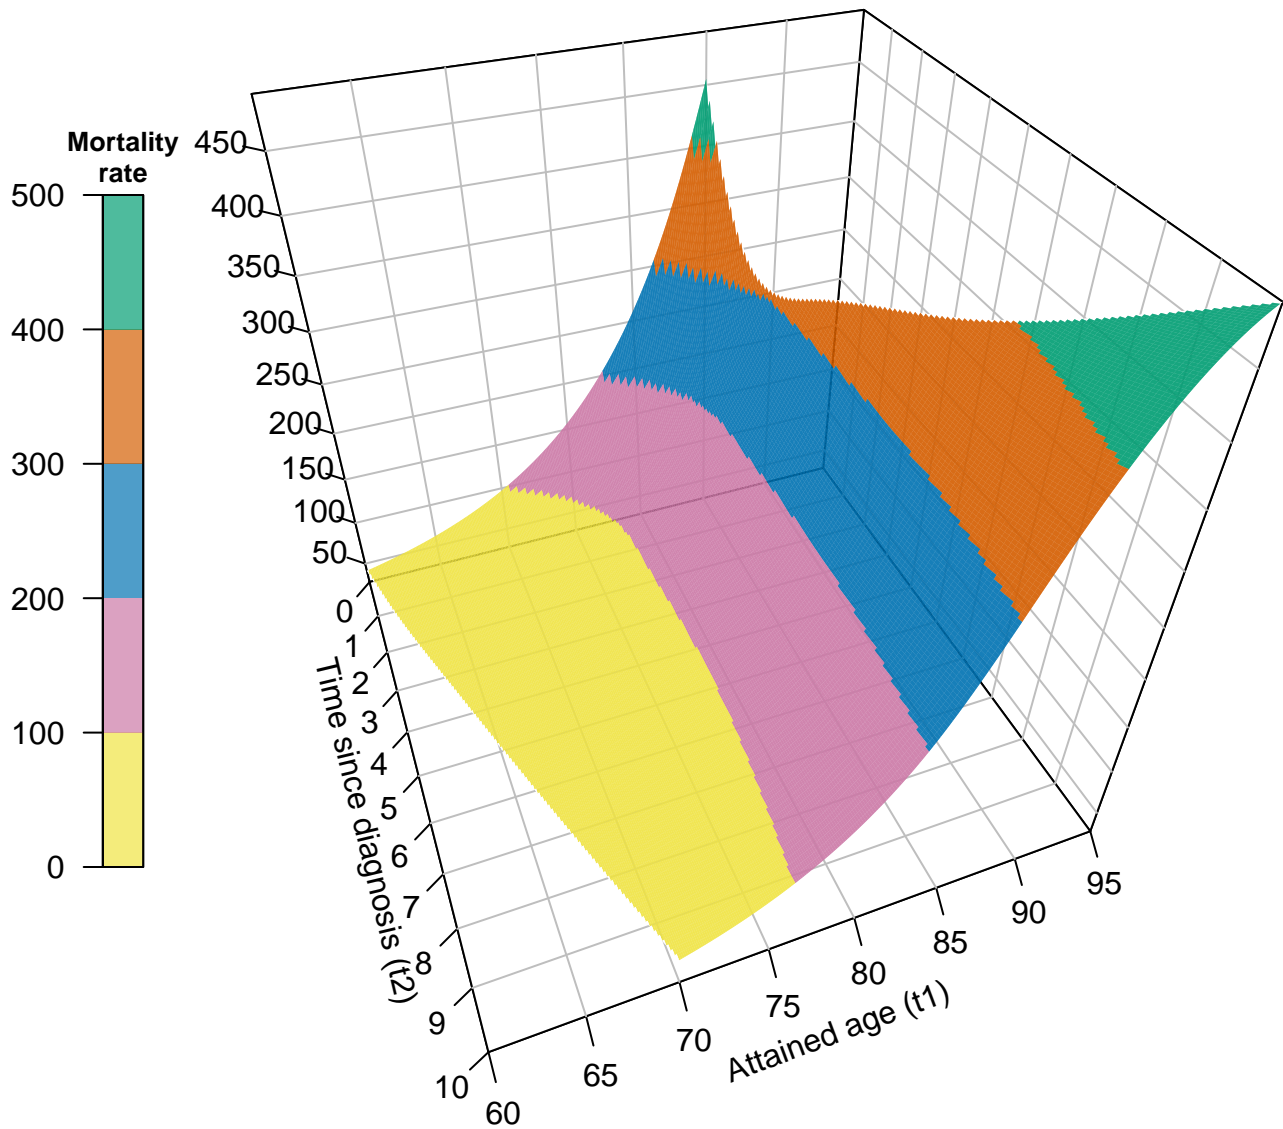

Supplement: Supplementary file 1 [file d8b75c7a73c89cf46234a76b.pdf]

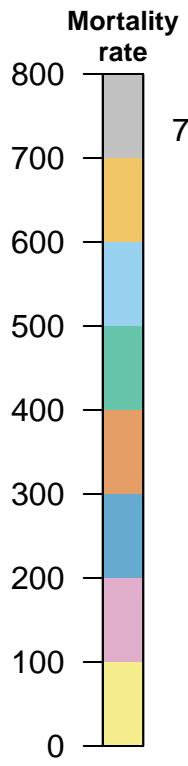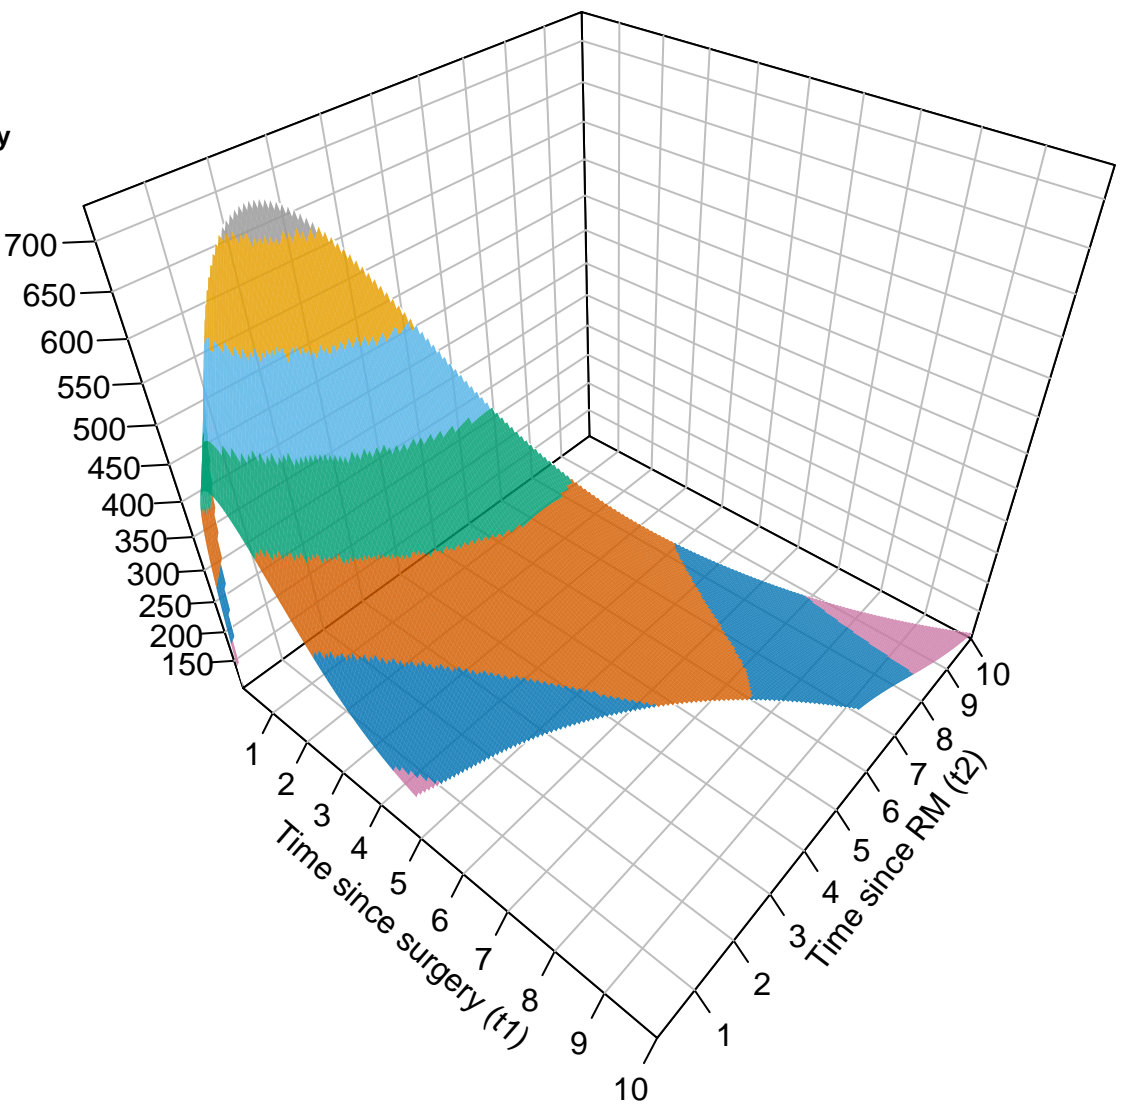

Supplement: Supplementary file 2 [file fbc2469c45780131e8d83265.pdf]
